# Supplementary material for: Comparative molecular analyses of Borrelia burgdorferi sensu stricto strains B31 and N40D10/E9 and determination of their pathogenicity
Source: PubMed Central journal article supplement (PMC3511255; doi:10.1186/1471-2180-12-157), 2012-07-30
Supplement: 1471-2180-12-157-S1.pdf [file 1471-2180-12-157-S1.pdf]

**Additional Table 1. Primers used for PCR amplification of the specific genes encoding virulence factors of *B. burgdorferi*.**

| Gene                 | Sequence                                  | Tm(°C) |
|----------------------|-------------------------------------------|--------|
| <i>bb0153</i>        | ATGTTTAAGCTGCCAGAACTT                     | 59.5   |
|                      | CTAATTAATCACTTCATTGTAAACTTTTG             | 60.2   |
| <i>bb0184 (csrA)</i> | ATGCTAGTATTGTCAAGAAAAGCA                  | 60.7   |
|                      | TTAATTTTCATTCTTGAAATAATGATTA              | 59.0   |
| <i>bb0219</i>        | ATGATAAAATCAATTTTAGATTATT                 | 53.2   |
|                      | TTAACCTAGTGAAACATCGAG                     | 56.0   |
| <i>bb0268</i>        | ATGTTTATAAGCAGGGAATTGA                    | 59.0   |
|                      | TTATTCCTTCTTGCTCATTAAAG                   | 58.2   |
| <i>bb0383(bmpA)</i>  | ATGAATAAAATATTGTTGTTGA                    | 53.0   |
|                      | TTAAATAAATTCTTTAAGAACTTC                  | 53.3   |
| <i>bb0647 (bosR)</i> | ATGAACGACAACATAATAGACGT                   | 59.0   |
|                      | TCATAAAGTGATTCCTTGTTTC                    | 57.3   |
| <i>bba25 (dbpB)</i>  | TGTAGTATTGGATTAGT                         | 40.4   |
|                      | ACTAATCCAATACTACA                         | 40.4   |
| <i>bba68 (cspA)</i>  | TTGAAAAAAGCCAACTAAATAT                    | 57.6   |
|                      | TTAGTAAAAGGCAGGTTTTAAAG                   | 57.4   |
| <i>bbd14</i>         | ATGATAATAAAAAATAAAAAATAATGTC              | 54.2   |
|                      | AATTTTGATTAATTTTAATTTTGCTGATTCTTTAAAACCT  | 69.1   |
| <i>bbd18</i>         | ATGCAAAAAGAAATAACAATAAACTAT               | 58.3   |
|                      | TTAAATTTTGTTTTTTCCCC                      | 60.4   |
| <i>bbe22 (pncA)</i>  | TATAAATAGTAGTTTTCTAATTAATACTATTGAA        | 56.9   |
|                      | AATAATTTCTTTGATTAACCAACTTCAAATTA          | 64.2   |
| <i>bbg02</i>         | GTGGAAATAAATTTACAAAGTAAAT                 | 55.5   |
|                      | CTATTTTTTTGTATGCCAATT                     | 56.5   |
| <i>bbh06 (cspZ)</i>  | ATCTCTAAAGATTTTAGCAGGGGAGAA               | 65.0   |
|                      | CCTTGTGATCTATAATAAAGTTTGCTTAATAG          | 62.3   |
| <i>bbj09 (ospD)</i>  | ATGAAAAAATTAATAAAAATACT                   | 49.9   |
|                      | TTAAGTATTTAACAAGGCCACA                    | 57.9   |
| <i>bbk17 (adeC)</i>  | ATGGATTTATTTAAAATTGAAGCTA                 | 58.0   |
|                      | TTAATAATCTACAAAACAAAAGAATC                | 57.0   |
| <i>bbk32</i>         | ATGATTTATTCATAAGATATGAA                   | 51.5   |
|                      | TTAGTACCAAACGCCATTCTTGTCATGA              | 70.8   |
| <i>bbu06</i>         | AATTAAGTATGTGGAGGATATATATATGAGCA          | 62.6   |
|                      | TCCTTTACTTTTAATTTAATTTCTTTCATTATCATATTTAG | 65.1   |
| <i>vlsE1</i>         | TTTCAAGTGCAATTTTATTAACAACCTTCT            | 64.4   |
|                      | GCAGCTTCAACAATCTCCTTTAT                   | 62.3   |
| <i>bb0147flank</i>   | TACCGTTAAGCGCATGAAAGATCAAGAAA             | 71.6   |
|                      | CCCTACTCAAAGCAAACCTCCTCAATAAGCC           | 71.7   |
